# Supplementary material
Source: publisher figshare collection journal article supplement (https://sage.figshare.com/ndownloader/files/14427521)
Supplement: Supplementary file 1 [file 14427521]

## Online appendix

Table A1. Means, standard deviations, coding of variables, and the wording of the survey questions.

| Variable                 | %/mean<br>(sd)   | Coding properties                                                                                                                                       | Wording of the question                                                                                                                                                                                                                                                                                                                                                                                                                                                |
|--------------------------|------------------|---------------------------------------------------------------------------------------------------------------------------------------------------------|------------------------------------------------------------------------------------------------------------------------------------------------------------------------------------------------------------------------------------------------------------------------------------------------------------------------------------------------------------------------------------------------------------------------------------------------------------------------|
| life satisfaction        | 7.61<br>(1.80)   | Linear variable, ranging from 0 to 10 (standardized in the analyses).                                                                                   | On a scale from 0 to 10, where 0 means completely dissatisfied and 10 means completely satisfied, how satisfied are you with your life?                                                                                                                                                                                                                                                                                                                                |
| working after retirement | 89%<br>11%       | Dummy variable:<br>0 = Full retirement<br>1 = working after retirement                                                                                  | a) "Have you received income from any of these [pension income] sources in the previous year?" This question was used to select the sample of retirees.<br>b) "The following questions are about your current main job." Various questions were then asked and used here to check current work status. For instance, "In this job are you an employee, a civil servant, or a self-employed?" Those who responded to this question were classified as working retirees. |
| pension income (/1000)   | 13.77<br>(18.76) | Continuous variable, ranging from 0.002 to 545.684. We use the natural log in the analyses. 99% of the cases range between 4 and 10 on the ln-variable. | After taxes, about how large was a typical payment of [old age, early retirement and survivor pensions / private and occupational pensions / disability pensions-benefits / unemployment benefits-insurances / social assistance] in (year)? Imputed for missing values by SHARE (Malter & Borsch-Supan, 2015).                                                                                                                                                        |
| no partner               | 73%<br>27%       | Dummy variable:<br>0 = partner (1-3)<br>1 = no partner (4-6)                                                                                            | What is your marital status? Answer categories were: 1. Married and living together with spouse; 2. Registered partnership; 3. Married, living separately from spouse; 4. Never married; 5. Divorced; 6. Widowed                                                                                                                                                                                                                                                       |

|                          |                 |                                                                                |                                                                                                                                                                                                                          |
|--------------------------|-----------------|--------------------------------------------------------------------------------|--------------------------------------------------------------------------------------------------------------------------------------------------------------------------------------------------------------------------|
| child                    | 9%<br>91%       | Dummy variable:<br>0 = no children<br>1 = children                             | a) How many children do you have that are still alive? Please count all natural children, fostered, adopted and stepchildren.                                                                                            |
| female                   | 47%<br>53%      | Dummy variable:<br>0 = male<br>1 = female                                      | Observation by the interviewer.                                                                                                                                                                                          |
| age                      | 67.98<br>(4.21) | Continuous variable,<br>ranging from 60 to 75                                  | Information available prior to the interview.                                                                                                                                                                            |
| Level of education       | 2.80<br>(1.43)  | Continuous variable,<br>ranging from 0 to 6.                                   | What is the highest school leaving certificate or school degree that you have obtained? Coded into ISCED-97 classification by SHARE team.                                                                                |
| chronic diseases         | 1.84<br>(1.52)  | Continuous variable,<br>ranging from 0 to 14.                                  | Do you currently have any of the conditions on this card? (With this we mean that a doctor has told you that you have this condition, and that you are either currently being treated for or bothered by this condition) |
| limited daily activities | 91%<br>9%       | Dummy variable:<br>0 = no<br>1 = yes, 1 or more                                | Please tell me whether you have any difficulty doing each of the everyday activities on card 10. Exclude any difficulties that you expect to last less than three months.                                                |
| GDP per capita           | 35.11<br>(8.04) | Continuous variable,<br>ranging from 20.24 to 50.88 (centered in the analyses) | Data retrieved from the United Nations – World Bank (gdp values / 1000)                                                                                                                                                  |

---

Source: SHARE, [www.share-project.org](http://www.share-project.org)

**Table 2A. Country descriptions.**

|                | N in<br>sample | Mean life<br>satisfaction | % working<br>retirees | % without<br>a partner | GDP   |
|----------------|----------------|---------------------------|-----------------------|------------------------|-------|
| Austria        | 4636           | 8.17                      | 7                     | 36                     | 42.24 |
| Germany        | 3683           | 7.70                      | 12                    | 21                     | 39.79 |
| Sweden         | 3633           | 8.45                      | 20                    | 22                     | 40.94 |
| Netherlands    | 3074           | 8.00                      | 10                    | 21                     | 43.05 |
| Spain          | 3048           | 7.53                      | 3                     | 22                     | 32.51 |
| Italy          | 4054           | 7.46                      | 6                     | 20                     | 34.66 |
| France         | 4918           | 7.32                      | 6                     | 31                     | 36.15 |
| Denmark        | 2925           | 8.63                      | 14                    | 27                     | 42.63 |
| Switzerland    | 2638           | 8.45                      | 20                    | 26                     | 50.88 |
| Belgium        | 4481           | 7.71                      | 6                     | 30                     | 39.86 |
| Czech Republic | 6327           | 7.29                      | 13                    | 32                     | 26.61 |
| Poland         | 1653           | 6.94                      | 4                     | 23                     | 20.24 |
| Hungary        | 1257           | 6.85                      | 6                     | 29                     | 22.48 |
| Portugal       | 525            | 7.08                      | 8                     | 21                     | 25.92 |
| Slovenia       | 2150           | 7.40                      | 3                     | 23                     | 28.42 |
| Estonia        | 5154           | 6.49                      | 22                    | 35                     | 23.00 |

Source: SHARE, waves 2, 4 and 5.
